# Supplementary material for: Coordination behaviour of new dipyridylpyrazole ligands towards ZnCl2and PdCl2fragments. Crystalline structural characterization and multinuclear NMR studies as evidence of linkage and conformational isomers
Source: Royal Society of Chemistry journal article supplement (doi:10.1039/c3ra45821k), 2014-01-01
Supplement: c3ra45821k.pdf [file c3ra45821k.pdf]

**Table S1** Selected bond distances (Å) and angles (°) for [pypz<sup>R(1)py</sup>]-H<sub>2</sub>O

|               |          |                  |          |
|---------------|----------|------------------|----------|
| <b>N1-N2</b>  | 1.356(5) | <b>N1-N2-C3</b>  | 103.9(4) |
| <b>N1-C5</b>  | 1.383(5) | <b>N2-N1-C5</b>  | 112.4(4) |
| <b>N1-C6</b>  | 1.431(6) | <b>N2-C3-C4</b>  | 112.0(4) |
| <b>N2-C3</b>  | 1.342(5) | <b>N1-C5-C4</b>  | 105.5(4) |
| <b>C3-C4</b>  | 1.390(6) | <b>C3-C4-C5</b>  | 106.2(4) |
| <b>C4-C5</b>  | 1.370(6) | <b>N2-C3-C11</b> | 120.1(4) |
| <b>C5-C16</b> | 1.477(6) | <b>N1-C5-C6</b>  | 129.3(4) |
| <b>C3-C11</b> | 1.486(6) |                  |          |

**Table S2** Dihedral angles between planes for [pz<sup>R(1)py</sup>]-H<sub>2</sub>O

|                                     |         |
|-------------------------------------|---------|
| <b>Plane 1: N1N2C3C4C5</b>          |         |
| <b>Plane 2: N1'C6C7C8C9C10</b>      |         |
| <b>Plane 3: N1''C11C12C13C14C15</b> |         |
| <b>Plane 4: C16C17C18C19C20C21</b>  |         |
| <b>1-2</b>                          | 57.9(2) |
| <b>1-3</b>                          | 20.8(2) |
| <b>1-4</b>                          | 28.7(2) |
| <b>2-3</b>                          | 46.5(2) |
| <b>2-4</b>                          | 59.3(2) |
| <b>3-4</b>                          | 15.7(2) |
